# Supplementary figures and images for: Preparation of lead dodecyl sulfate nanorod materials mediated by mechanochemistry and green solvent-free catalytic synthesis of heterocyclic derivatives
Source: Royal Society of Chemistry journal article supplement (doi:10.1039/d4mr00123k), 2025-01-01

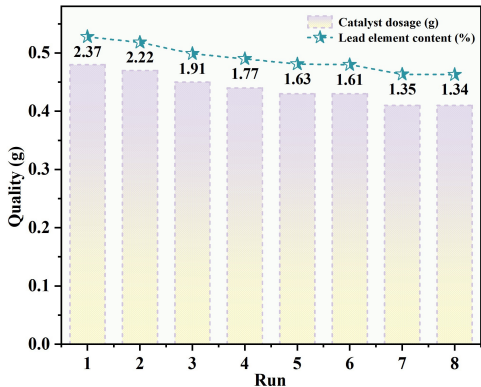

Supplement: d4mr00123k2.pdf [file d4mr00123k2.pdf]
